# Supplementary material for: Serological diagnosis of soil-transmitted helminth (Ascaris, Trichuris and hookworm) infections: A scoping review
Source: PubMed Central journal article supplement (PMC10994556; doi:10.1371/journal.pntd.0012049), 2024-04-04
Supplement: pntd.0012049.s004.pdf [file pntd.0012049.s004.pdf]

## S4 Info. Characteristics of the assays used for serodiagnosis of STHs considering the evolving landscape of research over time

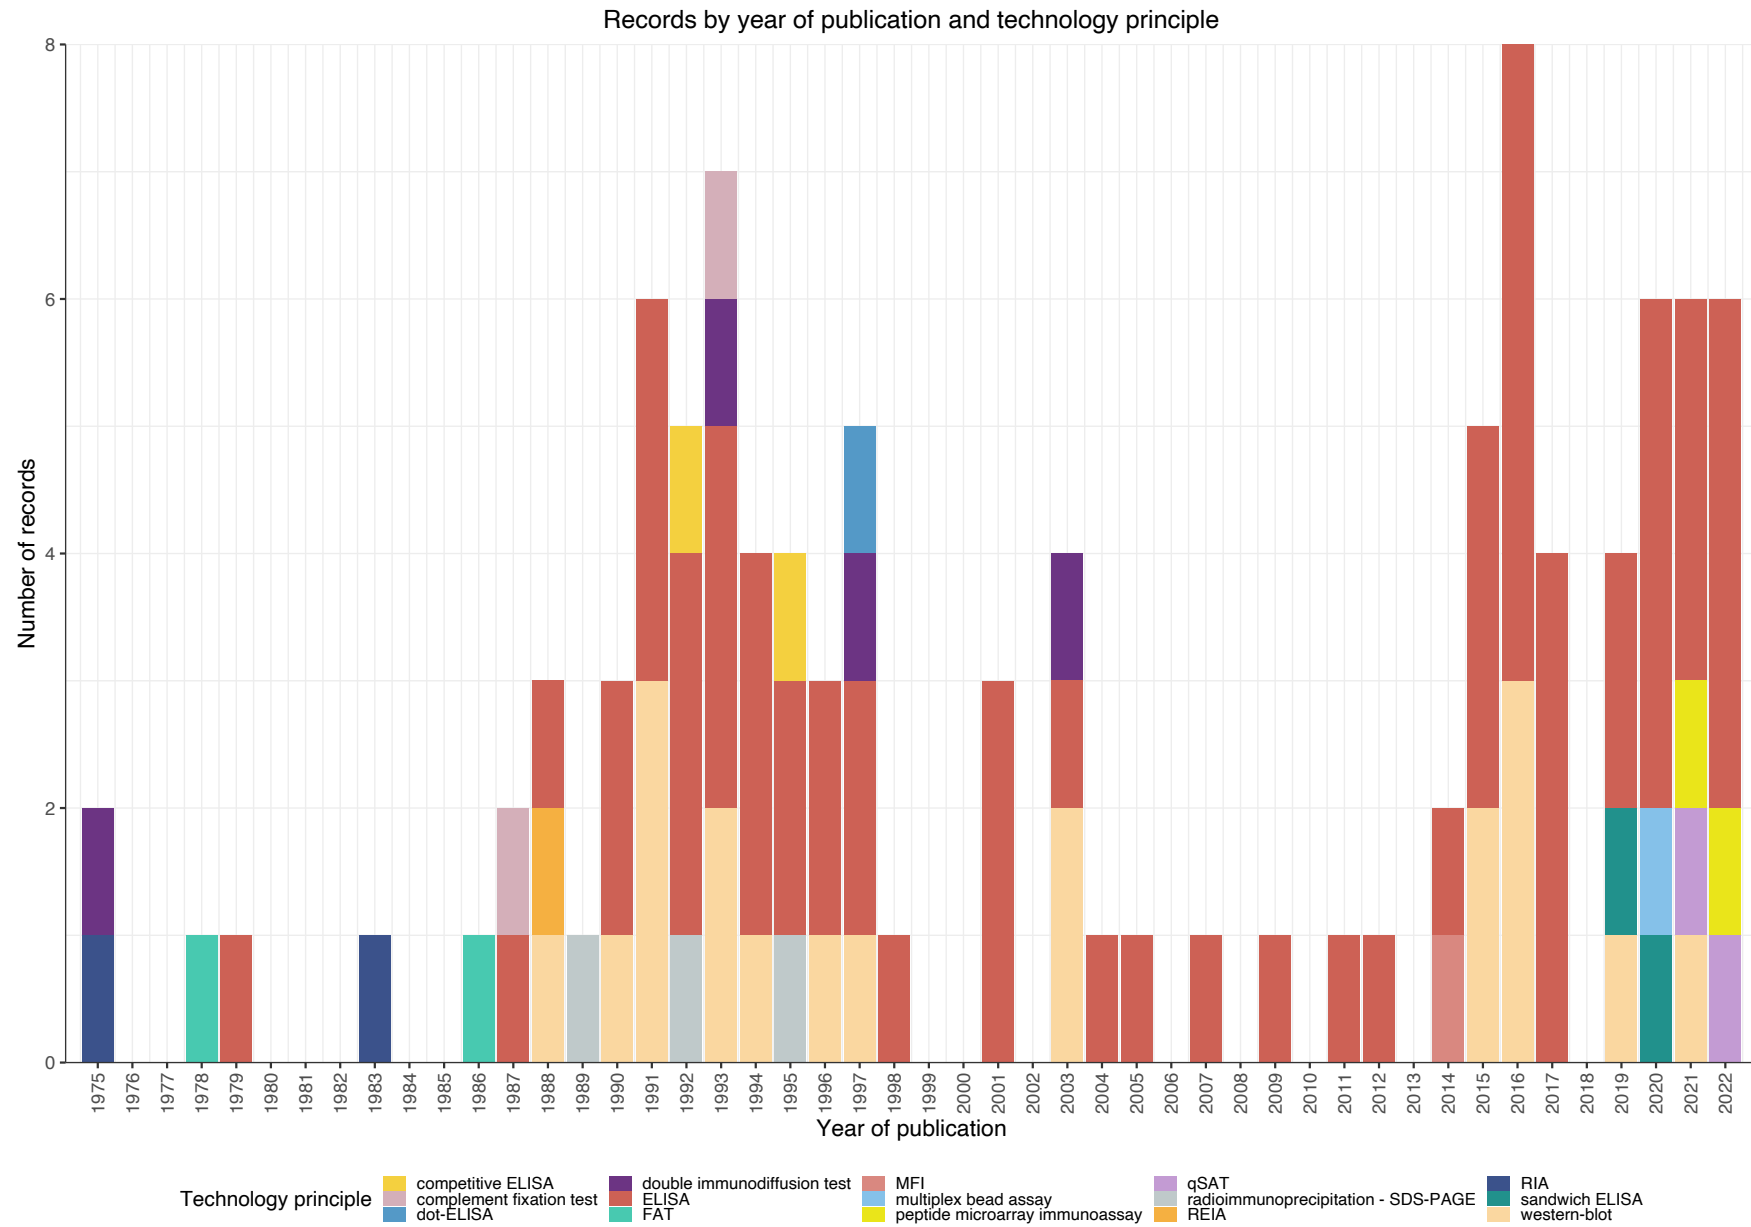

### Records by analyte detection agent

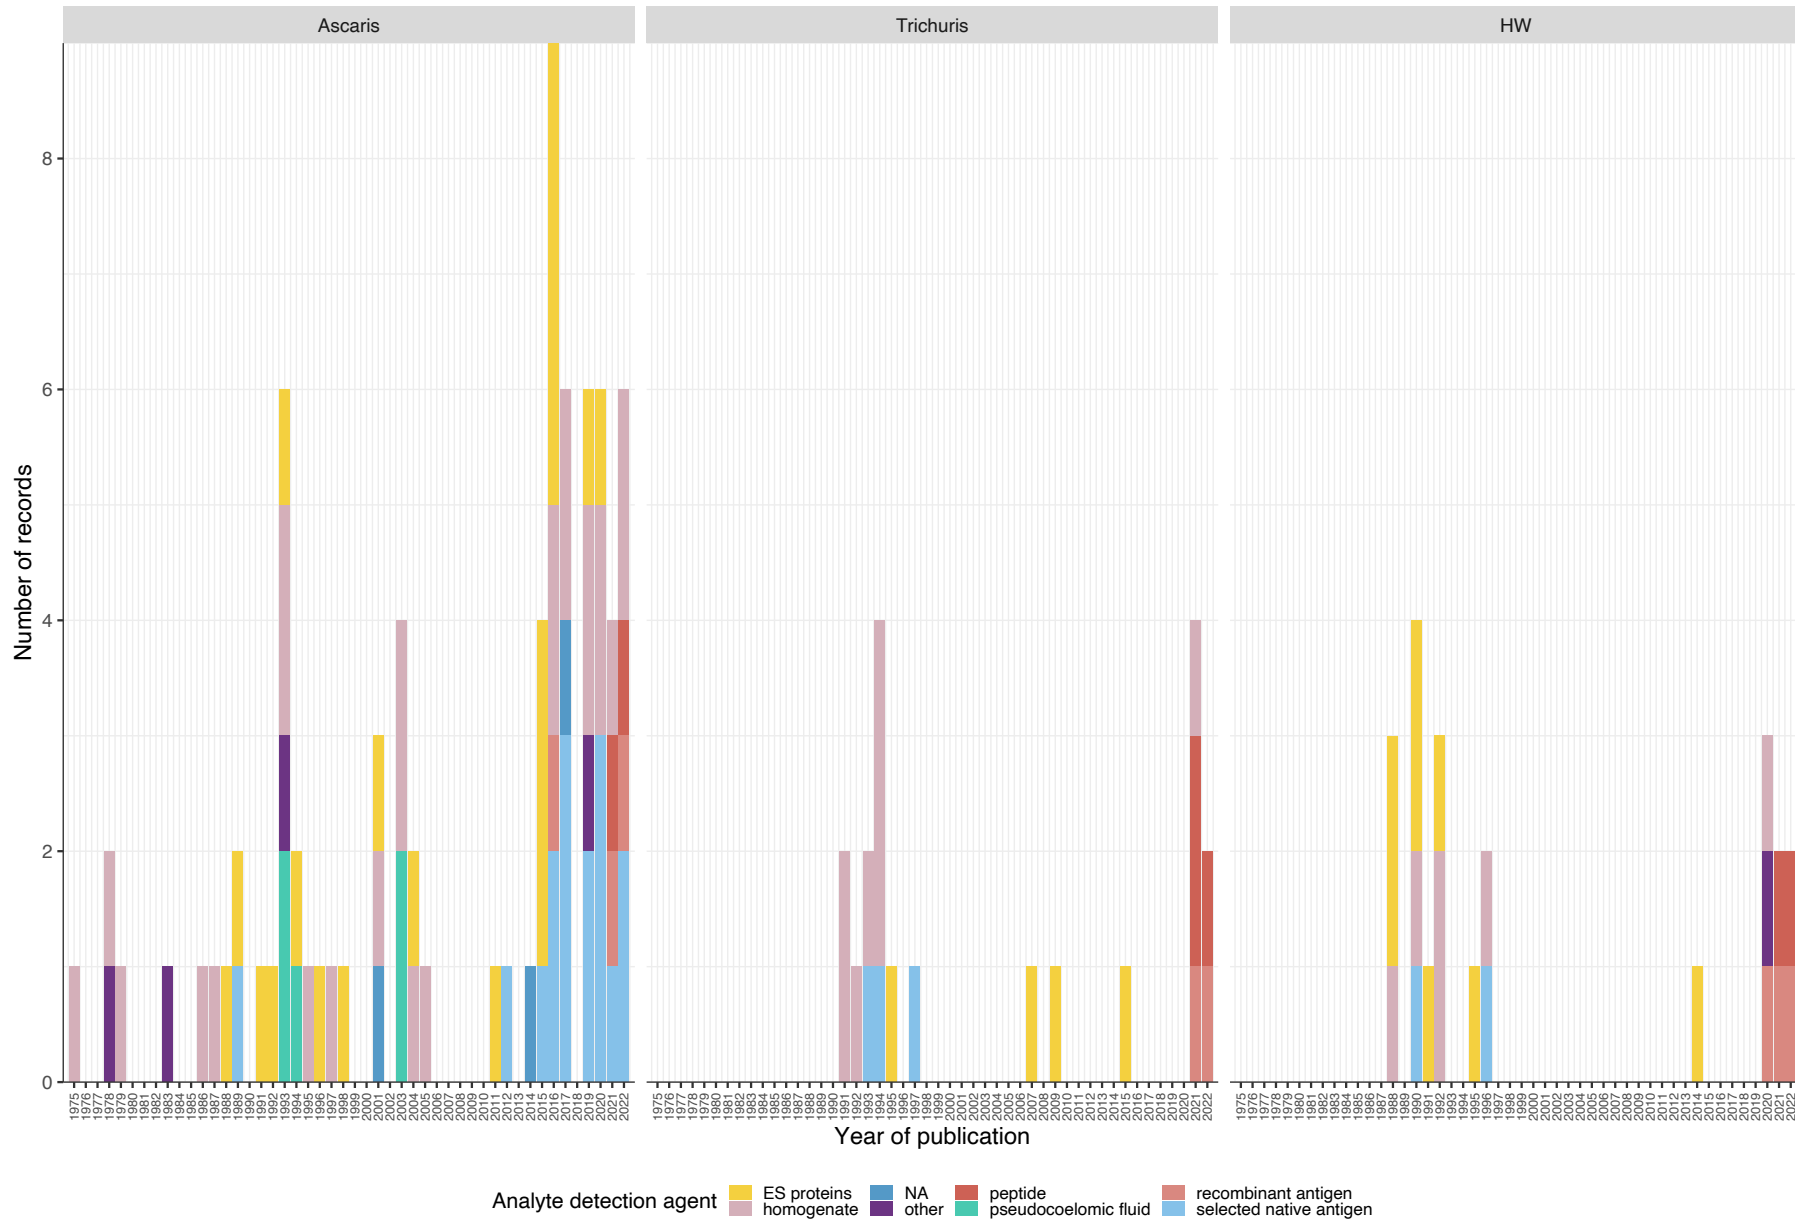

### Serological diagnosis of soil-transmitted helminth (*Ascaris*, *Trichuris* and hookworm) infections: a scoping review

Sara Roose, Fiona Vande Velde, Johnny Vlamincq, Peter Geldhof, Bruno Levecke

### Records by target analyte

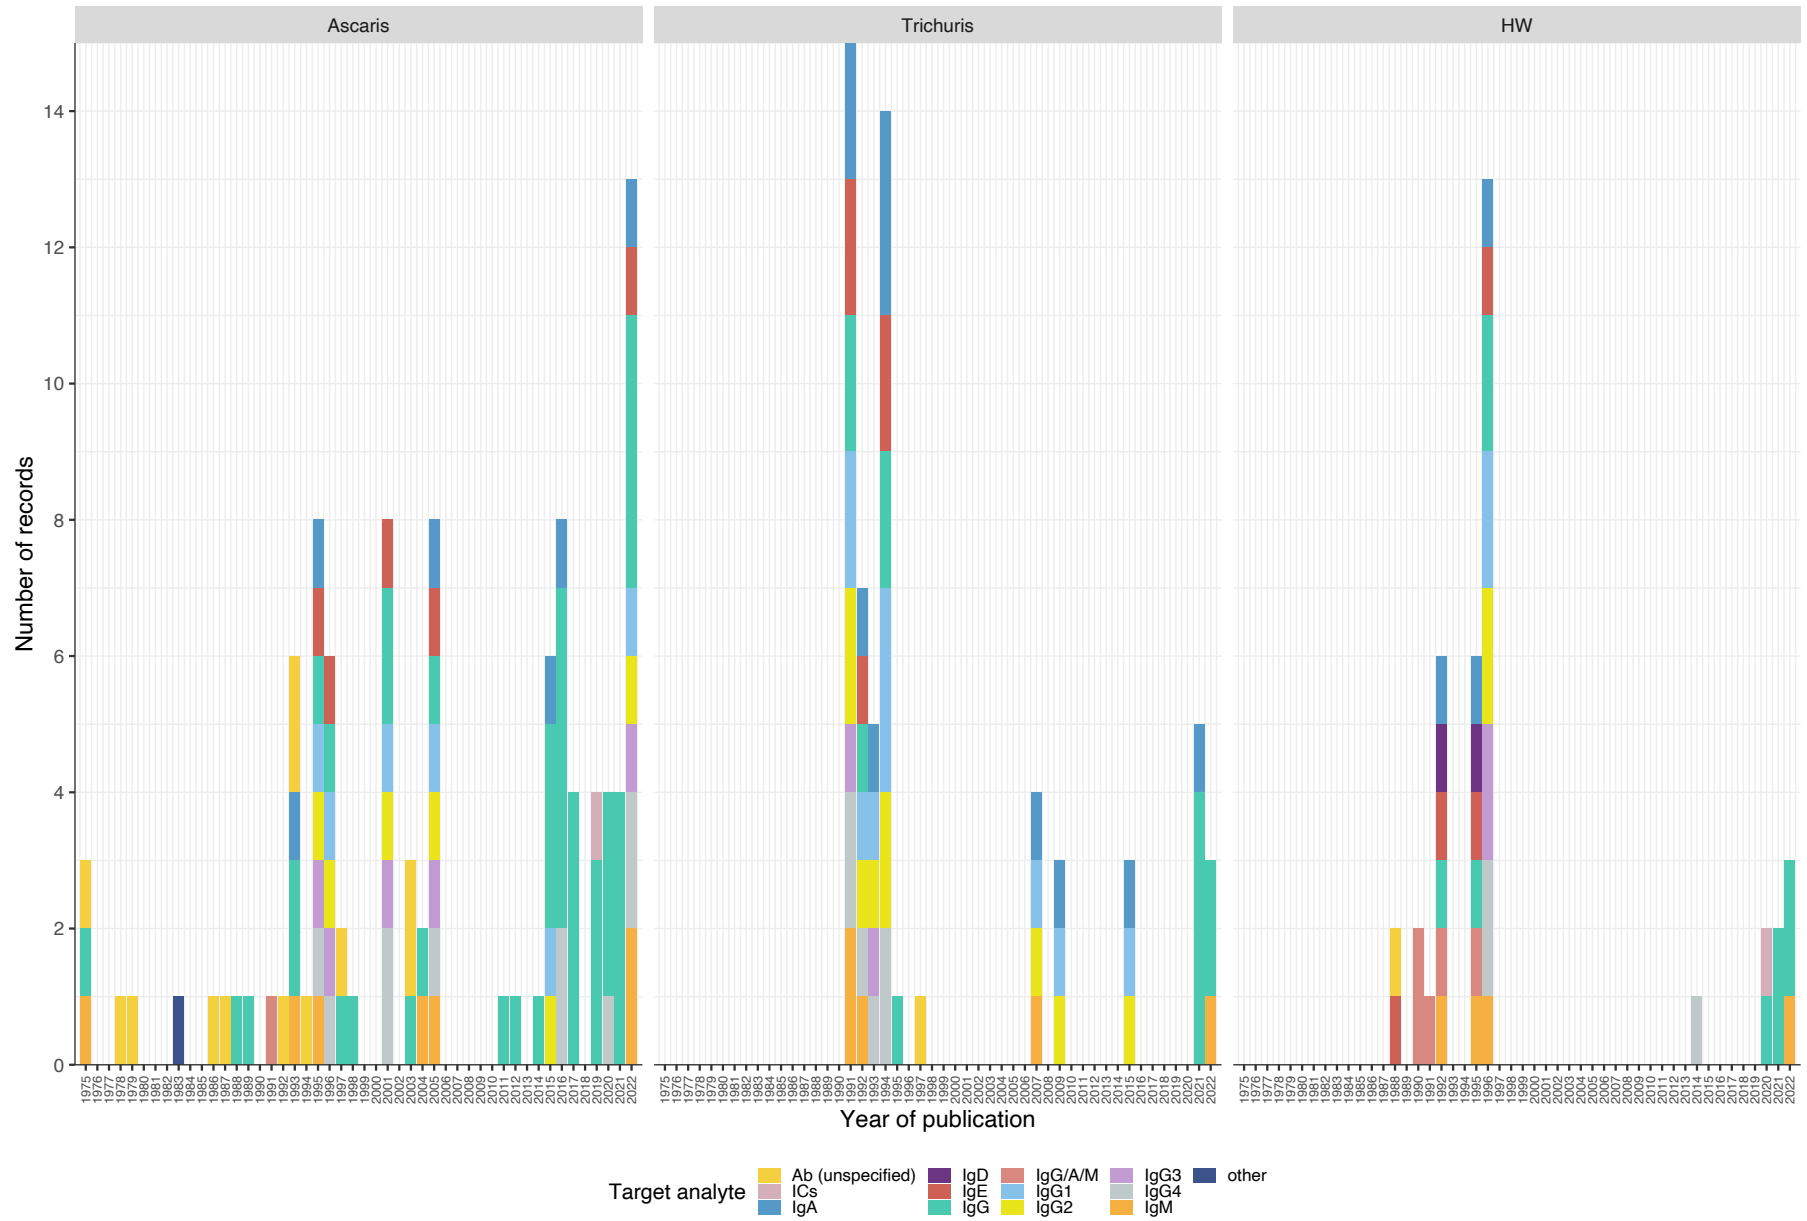

### Serological diagnosis of soil-transmitted helminth (*Ascaris*, *Trichuris* and hookworm) infections: a scoping review

Sara Roose, Fiona Vande Velde, Johnny Vlamincq, Peter Geldhof, Bruno Levecke
