# Supplementary material for: Serological diagnosis of soil-transmitted helminth (Ascaris, Trichuris and hookworm) infections: A scoping review
Source: PubMed Central journal article supplement (PMC10994556; doi:10.1371/journal.pntd.0012049), 2024-04-04
Supplement: pntd.0012049.s006.pdf [file pntd.0012049.s006.pdf]

## Serological diagnosis of soil-transmitted helminth (*Ascaris*, *Trichuris* and hookworm) infections: a scoping review

Sara Roose<sup>1\*</sup>, Fiona Vande Velde<sup>1</sup>, Johnny Vlamincx<sup>1</sup>, Peter Geldhof<sup>1</sup>, Bruno Levecke<sup>1\*</sup>

<sup>1</sup> Department of Translational Physiology, Infectiology and Public Health, Ghent University, Merelbeke, Belgium

\* Corresponding authors: Bruno.levecke@ugent.be (BL), sara.roose@ugent.be (SR)

### Supporting information 6 - Overview of the patent documents related to serological diagnosis for soil-transmitted helminthiases

| Title                                                                                                      | Invention                                                                                                                                                | Target species | Technology principle                                                              | Target analyte                                                                  | Analyte-detection agent                                | Test species | Publication     | Year |
|------------------------------------------------------------------------------------------------------------|----------------------------------------------------------------------------------------------------------------------------------------------------------|----------------|-----------------------------------------------------------------------------------|---------------------------------------------------------------------------------|--------------------------------------------------------|--------------|-----------------|------|
| Nucleic acids encoding <i>Ancylostoma</i> secreted protein                                                 | Nucleic acid molecule for the recombinant production of ASP protein for vaccination, selective treatment and diagnostics                                 | Hookworm       | Any of the known methods for detection of antigens, nucleic acids, and antibodies | ASP, hookworm nucleic acid, and anti-ASP antibodies                             | <i>Ancylostoma</i> Secreted Protein (ASP) of 37-40 kDa | Human, dog   | US5753787       | 1998 |
| Immunological method for the diagnosis of avian ascariasis                                                 | In vitro method of diagnosing avian ascariasis and diagnostic kit                                                                                        | <i>Ascaris</i> | ELISA                                                                             | IgG                                                                             | complete <i>Ascaris suum</i> extract                   | Poultry      | WO2005071415 A1 | 2005 |
| Method of specific <i>Ascaris lumbricoides</i> detection in clinical material in various stages of disease | Highly specific and highly sensitive method for the specific detection of <i>Ascaris lumbricoides</i> at various, including early, stages of the disease | <i>Ascaris</i> | PCR                                                                               | fragment of the 18S gene of ribosomal RNA (rRNA) of <i>Ascaris lumbricoides</i> | NA                                                     | Human        | RU2424525C1     | 2011 |

Records were retrieved by an Espacenet patent search. NA: information not available.
